# Supplementary material for: Does Reiki Benefit Mental Health Symptoms Above Placebo?
Source: PubMed Central journal article supplement (PMC9326483; doi:10.3389/fpsyg.2022.897312), 2022-07-12
Supplement: Data_Sheet_1.pdf [file Data_Sheet_1.pdf]

## Supplementary Appendix A: Systematic Review Search Terms

### PubMed

reiki[tiab] AND (sham[tiab] OR placebo[tiab] OR mock[tiab] OR comparison[tiab])

### Ovid Medline

reiki.tw. AND (sham.tw. OR placebo.tw. OR mock.tw. OR comparison.tw.)

### Embase Elsevier

reiki:ti,ab AND (sham:ti,ab OR placebo:ti,ab OR mock:ti,ab OR comparison:ti,ab)

### Embase Ovid

reiki.tw. AND (sham.tw. OR placebo.tw. OR mock.tw. OR comparison.tw.)

### CINAHL

(TI reiki OR AB reiki) AND ((TI sham OR AB sham) OR (TI placebo OR AB placebo) OR (TI mock OR AB mock) OR (TI comparison OR AB comparison))

### Web of Science

reiki AND (sham OR placebo OR mock OR comparison)

### SCOPUS

reiki AND (sham OR placebo OR mock OR comparison)

### PsychInfo (Ovid)

reiki.ti,ab. AND (sham.ti,ab. OR placebo.ti,ab. OR mock.ti,ab. OR comparison.ti,ab.)

### ProQuest Health and Medical

TI,AB(reiki) AND (TI,AB(sham) OR TI,AB(placebo) OR TI,AB(mock) OR TI,AB(comparison))
