# Supplementary material for: Does Reiki Benefit Mental Health Symptoms Above Placebo?
Source: PubMed Central journal article supplement (PMC9326483; doi:10.3389/fpsyg.2022.897312), 2022-07-12
Supplement: Image_1.pdf [file Image_1.pdf]

Supplementary PRISMA Diagram 1: Flow Chart for Systematic Review

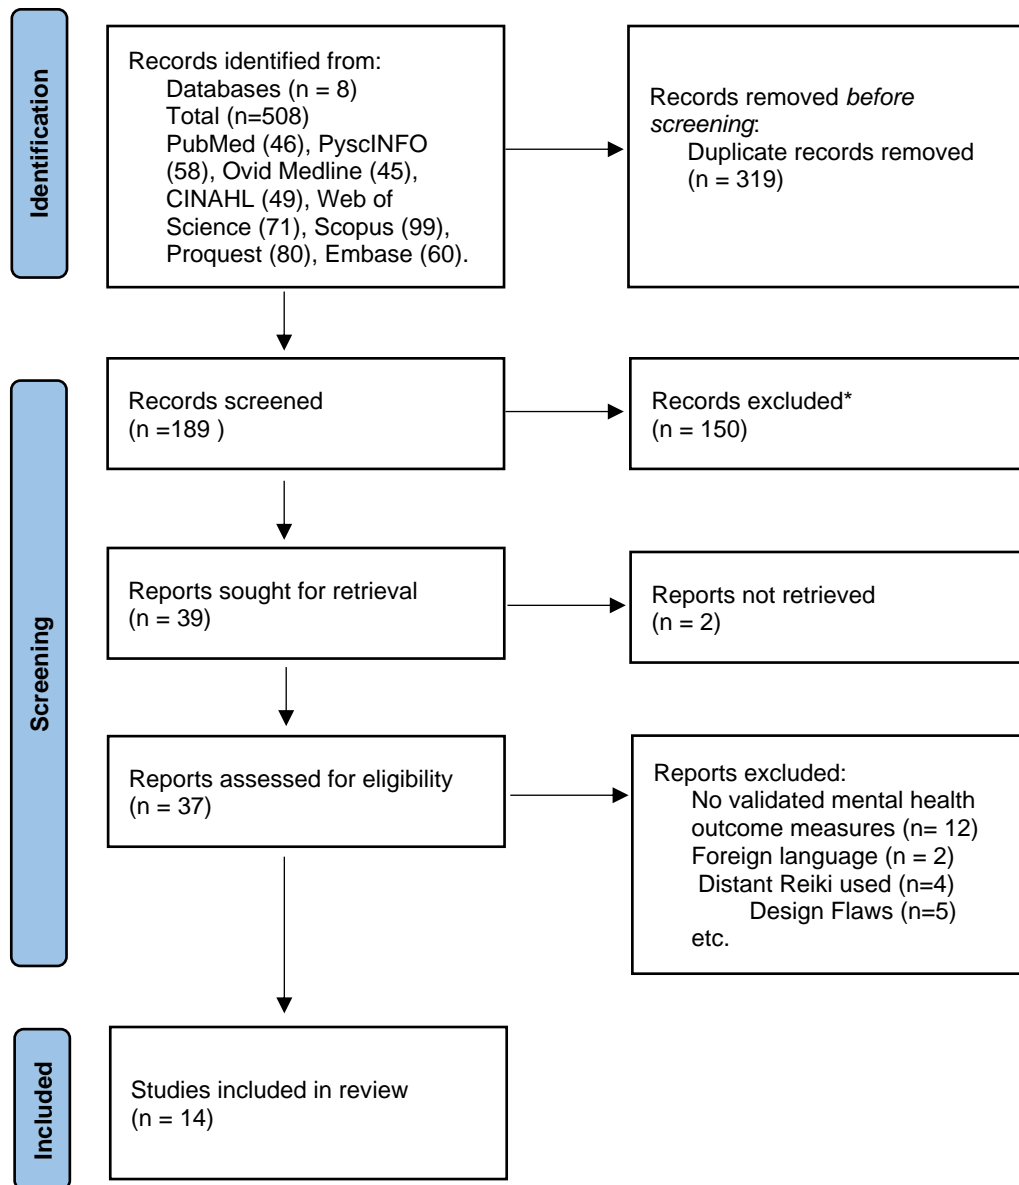

\*All excluded by a manually using excel.
