# Supplementary material for: Does Reiki Benefit Mental Health Symptoms Above Placebo?
Source: PubMed Central journal article supplement (PMC9326483; doi:10.3389/fpsyg.2022.897312), 2022-07-12
Supplement: Table_1.pdf [file Table_1.pdf]

**Supplementary Table 1: Extended Summary of Findings**

**The Effect of Reiki Versus Placebo in Adults  
RPCT which used standardized outcome measures for symptoms of Mental Health**

**Anxiety: Outcomes clinically relevant.**  
**GRADE: HIGH for reducing clinical anxiety**

|                                     | <b>Cinar et. al. (2022)<br/>Fibromyalgia</b>                                                                         | <b>Baldwin, et al. (2017) Knee<br/>Replacement Surgery</b>                                                                                                     | <b>Dressen &amp; Singg (1998)<br/>Chronically ill &amp; in pain.</b>                                                                                                                     |
|-------------------------------------|----------------------------------------------------------------------------------------------------------------------|----------------------------------------------------------------------------------------------------------------------------------------------------------------|------------------------------------------------------------------------------------------------------------------------------------------------------------------------------------------|
| <b>Population</b>                   | University Medical Faculty Hospital fibromyalgia. Bursa, Turkey                                                      | Acute care hospital sched knee replacem surgery. Arizona, US                                                                                                   | Self-selected or GP referred for chronic pain. Texas, US                                                                                                                                 |
| <b>N</b>                            | 50                                                                                                                   | 46                                                                                                                                                             | 120                                                                                                                                                                                      |
| <b>Delivery</b>                     | Reiki Hands on<br>Reiki Sham                                                                                         | Reiki Hands on.<br>Sham<br>Quiet time control.                                                                                                                 | Reiki hands on.<br>PMR<br>Sham<br>Control-quiet reading N=30                                                                                                                             |
| <b>Time x Freq</b>                  | 30 mins/Wk X 4 weeks.                                                                                                | 30min x 3 or 4.                                                                                                                                                | 30min x 10 bi-weekly.                                                                                                                                                                    |
| <b>Measure</b>                      | STAI                                                                                                                 | STAI                                                                                                                                                           | STAI                                                                                                                                                                                     |
| <b>Practitioner Level/Exp</b>       | Reiki by "a researcher" NI re experience or level.                                                                   | Lev 3 master<br>Not done by researchers.                                                                                                                       | 3 Reiki masters<br>Not done by researcher.                                                                                                                                               |
| <b>SS eyes/ touch</b>               | NI re eyes.<br>Touched.                                                                                              | Touched.<br>NI re eyes.<br>Tested blinding after trt and effective.                                                                                            | Touch for head positions held over body for torso. NI re eyes.                                                                                                                           |
| <b>Baseline clinically relevant</b> | Yes STAI means > 39-40. State 40.18, Trait 51.44                                                                     | YES overall.<br>R39.1<br>SR42.2<br>C42.6                                                                                                                       | Anxiety Yes all >39-40 on STAI                                                                                                                                                           |
| <b>% Females</b>                    | 88%                                                                                                                  | Not given. M/F                                                                                                                                                 | 60                                                                                                                                                                                       |
| <b>Significance (P Value)</b>       | <b>Post 4<sup>th</sup> trt Reiki sig lower than placebo for state anxiety (p=0.005) And trait anxiety (p=0.003).</b> | No comparison made due to small sample size of control.<br><b>Within grp Reiki sig p=0.004 and Placebo NS.</b>                                                 | <b>Sig pre-post State Anxiety p=0.0001 Trait Anxiety p=0.0001 And Reiki significantly &gt; Placebo (no p given)</b>                                                                      |
| <b>ROB 2</b>                        | Some concerns                                                                                                        | Some Concerns                                                                                                                                                  | Some Concerns                                                                                                                                                                            |
| <b>Critique</b>                     | No pre-specified analysis plan found.<br>--Reiki done by "an experimenter" unclear if an author.                     | -If the Reiki size better matched placebo Reiki may not have performed as well.<br>-Blinding assessed as successful.<br>-No pre-specified analysis plan found. | -Unstated if assessors blind.<br>-Subjects self-selected in response to advertisement.<br>-No pre-specified analysis plan.<br>-Follow up Reiki scores were not compared to other groups. |

**Anxiety: outcomes for the normal range.**  
**GRADE: MODERATE for Not Reducing Normal anxiety.**

|                                     | <b>Bowden, Goddard and Gruzelier (2010) Well-being.</b>                                        | <b>Bowden et al. (2011) Mood and wellbeing in High vs Low Mood</b>                            | <b>Thornton (1991) Female Nurses Unpublished</b>            |
|-------------------------------------|------------------------------------------------------------------------------------------------|-----------------------------------------------------------------------------------------------|-------------------------------------------------------------|
| <b>Population</b>                   | University students. London UK                                                                 | University students. London UK                                                                | Healthy female volunteer nursing students. California US    |
| <b>N</b>                            | R18 PR17 (n=5 or 6 subgrp)                                                                     | 40 R20 P20 (10 per high and Low)                                                              | 42 i.e. R22 SR 20                                           |
| <b>Delivery</b>                     | Non-contact Reiki<br>No reiki (blind 3-30 inches above head)<br>All self-hypnosis/ +ve imagery | Non-contact Reiki (3-30 inches above head)<br>No Reiki                                        | Hands on Reiki<br>Sham R                                    |
| <b>Time x Freq</b>                  | 10 x 20 mins (varied weeks)                                                                    | 30mins x 6 (varied weeks)                                                                     | 1 x 1hr                                                     |
| <b>Measure</b>                      | DASS, HADS.                                                                                    | DASS, HADS.                                                                                   | STAI                                                        |
| <b>Practitioner Level/Exp</b>       | Lvl 3 Master Usui, Seichim, Violet flame, Ascension R. No yrs exp given.<br>Not Researcher.    | Lvl 3 Master Usui, Seichim, Violet flame, Ascension R. 4yrs exper.<br>Not Researcher.         | Author administered Reiki 10 year's experience.             |
| <b>SS eyes/ touch</b>               | No touch 3-30 inches above head/back.<br>Blindfolded.                                          | No touch 3-30 inches above head/back.<br>Blindfolded                                          | "Hands on" assumed. NI re eyes.                             |
| <b>Baseline clinically relevant</b> | No all healthy psych undergraduates.                                                           | No Anx. Borderline normal cutoff 7. HADS<br>Mild/mod cut off. Sep means not given.            | No acute/ chronic cond.<br>All below cut-off 39-40 on STAI. |
| <b>% Females</b>                    | 60%                                                                                            | 82                                                                                            | 100%                                                        |
| <b>Significance (P Value)</b>       | Anxiety subscale DASS p=0.295                                                                  | Anxiety subscale DASS p=0.084 (high mood improvements maint f.up, placebo anxiety increased). | State Anxiety p=0.864<br>Trait Anxiety p=0.350              |
| <b>ROB 2</b>                        | Some Concerns                                                                                  | Some Concerns                                                                                 | Some Concerns                                               |

|                 |                                                                                                                                                                                                                                                |                                                                                                                                                                                                    |                                                                                                                                                        |
|-----------------|------------------------------------------------------------------------------------------------------------------------------------------------------------------------------------------------------------------------------------------------|----------------------------------------------------------------------------------------------------------------------------------------------------------------------------------------------------|--------------------------------------------------------------------------------------------------------------------------------------------------------|
| <b>Critique</b> | -Author administered Reiki but no touch (blinding successful p<0.05)<br>-Very small sample size likely decreased power (5 or 6 in each group)<br>-No pre-specified plan.<br>-Dropouts 14%<br>-High variation in time delivered but controlled. | -Very small sample decreased power.<br>-Experimenter administered Reiki however well blinded and participant blinding assessed as successful.<br>-High variation in time delivered but controlled. | - Small sample decreased power.<br>-Assessors were not blind<br>-Experimenter administered Reiki.<br>-Baseline differences not statistically analysed. |
|-----------------|------------------------------------------------------------------------------------------------------------------------------------------------------------------------------------------------------------------------------------------------|----------------------------------------------------------------------------------------------------------------------------------------------------------------------------------------------------|--------------------------------------------------------------------------------------------------------------------------------------------------------|

**Stress: Outcomes Clinically Relevant.**  
**GRADE: HIGH for reducing clinical stress.**

|                                     |                                                                                                                                                                                                    |                                                                                                                                                                                                                                                                                                                    |                                                                                                        |
|-------------------------------------|----------------------------------------------------------------------------------------------------------------------------------------------------------------------------------------------------|--------------------------------------------------------------------------------------------------------------------------------------------------------------------------------------------------------------------------------------------------------------------------------------------------------------------|--------------------------------------------------------------------------------------------------------|
|                                     | <b>Bowden et al. (2011) Mood and wellbeing in High vs Low Anxiety and Depression.</b>                                                                                                              | <b>Vasudev &amp; Shastri (2016) Self-perceived work-related stress software professionals.</b>                                                                                                                                                                                                                     | <b>Yuce and Tasci (2021) Stressed Caregivers of cancer patients.</b>                                   |
| <b>Population</b>                   | University students. London UK                                                                                                                                                                     | Software proff from IT companies complaining of high stress. Bangalore India.                                                                                                                                                                                                                                      | Oncology unit of a university hospital, Turkey.                                                        |
| <b>N</b>                            | 40 R20 P20 (10 per high and Low)                                                                                                                                                                   | 120                                                                                                                                                                                                                                                                                                                | 42<br>R21<br>S21                                                                                       |
| <b>Delivery</b>                     | Non-contact Reiki<br>No Reiki                                                                                                                                                                      | Hands on Reiki<br>Distant Placebo<br>No Reiki.                                                                                                                                                                                                                                                                     | Hands on Reiki<br>Sham R                                                                               |
| <b>Time x Freq</b>                  | 30mins x 6 Varied wks                                                                                                                                                                              | 5 mins x 21 over 21 days.                                                                                                                                                                                                                                                                                          | 45mins/wk for 6 weeks.                                                                                 |
| <b>Measure</b>                      | DASS                                                                                                                                                                                               | Perceived Stress Scale (PSS)                                                                                                                                                                                                                                                                                       | Caregiver Strain Index (CSI) 7 or > =high stress.                                                      |
| <b>Practitioner Level/Exp</b>       | Lvl 3 Master Usui, Seichim, Violet flame, Ascension R. 4yrs experience.<br>Not Researcher.                                                                                                         | Unstated level.<br>Author trained in Usui Reiki done by researcher.                                                                                                                                                                                                                                                | Lvl 2<br>Investigator Usui<br>Experience: NI                                                           |
| <b>SS eyes/ touch</b>               | No touch 3-30 inches above head/back.<br>Blindfolded                                                                                                                                               | Assume touch "hands on" and NI eyes.                                                                                                                                                                                                                                                                               | Touching 9 points. NI re eyes.                                                                         |
| <b>Baseline clinically relevant</b> | Yes Stress Mild range (11.2 in high mood) 6 cut off.                                                                                                                                               | Yes All scores Mod- HIGH. For Stress.                                                                                                                                                                                                                                                                              | Yes all high stress >7 on CSI.                                                                         |
| <b>% Females</b>                    | 82                                                                                                                                                                                                 | Not given                                                                                                                                                                                                                                                                                                          | 100%                                                                                                   |
| <b>Significance (P Value)</b>       | <b>R Sig reduced stress over &gt; placebo p=0.008.</b>                                                                                                                                             | <b>Hands on Reiki and DR Placebo p=0.028</b><br><b>DR and DRP p= 0.019</b><br>No diff bet hands on Reiki and DR p=0.878 suggests benefits from hands on R not due to touch or other placebo effects.                                                                                                               | <b>Sig CSI p&lt;0.001 at post-treatment 6 weeks.</b>                                                   |
| <b>ROB 2</b>                        | Some Concerns                                                                                                                                                                                      | Some Concerns                                                                                                                                                                                                                                                                                                      | Some Concerns                                                                                          |
| <b>Critique</b>                     | -Very small sample decreased power.<br>-Experimenter administered Reiki however well blinded and participant blinding assessed as successful.<br>-High variation in time delivered but controlled. | -Hands on and distant Reiki delivered by the experimenter but placebo told were given Reiki, and distant reiki told given placebo reiki.<br>No diff bet dist reiki and hands on reiki suggests hands on not influence by placebo effect.<br>-31% dropout rate (raw scores in thesis) though reasons mostly random. | Investigator administered Reiki and trained sham group.<br>-17% dropouts and no ITT analysis reported. |

**Stress: Outcomes Normal**  
**GRADE: LOW to MODERATE for reducing normal stress.**

|                   |                                                         |                                                           |
|-------------------|---------------------------------------------------------|-----------------------------------------------------------|
|                   | <b>Bowden, Goddard and Gruzelier (2010) Well-being.</b> | <b>Shore (2004) Depression and Self Perceived Stress.</b> |
| <b>Population</b> | University students. London UK                          | Self-selected resp to ad. need trt for dep & stress,      |

|                                 |                                                                                                                                                                                          |                                                                                                                                                                                                                                                                                                              |
|---------------------------------|------------------------------------------------------------------------------------------------------------------------------------------------------------------------------------------|--------------------------------------------------------------------------------------------------------------------------------------------------------------------------------------------------------------------------------------------------------------------------------------------------------------|
|                                 |                                                                                                                                                                                          | California, U.S.                                                                                                                                                                                                                                                                                             |
| <b>N</b>                        | R18 PR17                                                                                                                                                                                 | 46                                                                                                                                                                                                                                                                                                           |
| <b>Delivery</b>                 | Non-contact Reiki<br>No reiki (blind)<br>All self-hypnosis/ +ve imagery                                                                                                                  | Reiki, Distant Reiki or distant Reiki placebo                                                                                                                                                                                                                                                                |
| <b>Time x Freq</b>              | 10 x 20 mins                                                                                                                                                                             | 60-90 min/once wk for 6 wks.                                                                                                                                                                                                                                                                                 |
| <b>Measure</b>                  | HADS, DASS                                                                                                                                                                               | PSS-10                                                                                                                                                                                                                                                                                                       |
| <b>Practitioner Level/Exp</b>   | Lvl 3 Master Usui, Seichim, Violet flame,<br>Ascension R. No yrs exp given.<br>Not Researcher.                                                                                           | 12 Reiki masters, 3 level 2 practitioners. No researchers.                                                                                                                                                                                                                                                   |
| <b>SS eyes/ touch</b>           | No touch 3-30 inches above head/back.<br>Blindfolded.                                                                                                                                    | “Hands on” assumed. NI re eyes.                                                                                                                                                                                                                                                                              |
| <b>Baseline Clin. Relevant.</b> | No healthy psych undergraduates.                                                                                                                                                         | Scores PSS v low yet pre-screened for sig anxiety and depression                                                                                                                                                                                                                                             |
| <b>% Females</b>                | 60%                                                                                                                                                                                      | Not given.                                                                                                                                                                                                                                                                                                   |
| <b>Significance (P Value)</b>   | NS (p=0.054) stress subscale over placebo on DASS.                                                                                                                                       | Post-test p=0.029<br>One year follow up p =0.001                                                                                                                                                                                                                                                             |
| <b>ROB 2</b>                    | Some Concerns                                                                                                                                                                            | Some Concerns                                                                                                                                                                                                                                                                                                |
| <b>Critique</b>                 | Author administered Reiki but no touch (blinding successful p<0.05)<br>-Very small sample size likely decreased power (5 or 6 in each group)<br>-No pre-specified plan.<br>-Dropouts 14% | High drop out from post treatment to f. up though analyzed on original numbers. (73 to 46)<br>-Placebo R led to believe Hands On was the placebo grp to reduce expectancy.<br>-SS self-selected in response to advertisement as being in need of treatment for self-perceived depression and stress/anxiety. |

**Depression: Outcomes Clinically Relevant.**

**GRADE: HIGH** for reducing clinical depression

|                                     | <b>Dressen &amp; Singg (1998)<br/>Chronically ill &amp; in pain.</b> | <b>Shore (2004)<br/>Depression and Self Perceived Stress.</b>         | <b>Shiflett et. al. (2002)<br/>Functional Recovery Post Stroke Rehab.</b>               | <b>Erdogan &amp; Cinar (2016)<br/>Depression in the Elderly.</b>                                                                         |
|-------------------------------------|----------------------------------------------------------------------|-----------------------------------------------------------------------|-----------------------------------------------------------------------------------------|------------------------------------------------------------------------------------------------------------------------------------------|
| <b>Population</b>                   | Self selected or GP referred for chronic pain.<br>Texas, US          | Self-selected resp to ad. need trt for dep & stress, California, U.S. | Kessler Institute for Rehabilitation.<br>US                                             | 2 nursing homes<br>Istanbul Turkey                                                                                                       |
| <b>N</b>                            | 120                                                                  | 46                                                                    | 50 total<br>10RMaster<br>10RNovice<br>10Sham<br>20 historic control                     | 90<br>R30<br>S30<br>C30                                                                                                                  |
| <b>Delivery</b>                     | Reiki hands on.<br>PMR<br>Sham<br>Control-quiet reading<br>N=30      | Reiki, Distant Reiki or distant Reiki placebo.                        | Hands On                                                                                | Reiki<br>Sham<br>At rest control<br>Hands on.                                                                                            |
| <b>Time x Freq</b>                  | 30min x 10 bi-weekly.                                                | 60-90min/once wk for 6 wks.                                           | 6-10 x 30mins varied weeks.                                                             | 45-60mins/ once wk for 8 weeks. 5 mins/ position                                                                                         |
| <b>Measure</b>                      | STAI                                                                 | PSS-10                                                                | CES-D<br>FIM                                                                            | DASS<br>Geriatric Depression Scale long. Measured 1 <sup>st</sup> , 4 <sup>th</sup> , 8 <sup>th</sup> week and 1 month f up at 12 weeks. |
| <b>Practitioner Level/Exp</b>       | 3 Reiki masters<br>Not done by researcher.                           | 12 Reiki masters, 3 level 2 practitioners. No researchers.            | Lvl 3<br>Master Usui R Alliance<br>>10 yrs exp.<br>& Lvl 1                              | Lvl 3<br>Master<br>Unstated Exp.<br>Reiki done by researcher.                                                                            |
| <b>SS eyes/ touch</b>               | Touch for head positions held over body for torso. NI re eyes.       | “Hands on” assumed. NI re eyes.                                       | Double blind. Sham<br>Practitioners thought it was real. Hands on. NI re eyes.          | Touch yes.NI eyes. Sham<br>pract believed they delivered Reiki.                                                                          |
| <b>Baseline clinically relevant</b> | Anxiety Yes all>39-40 on STAI                                        | Scores PSS v low yet pre-screened for sig anxiety and depression      | Yes<br>Mild Depression.<br>16 cut-off on CES-D<br>All means but one above this but low. | Yes<br>Mod to severe clinical dep.<br>14 or higher on GDS                                                                                |
| <b>% Females</b>                    | 60                                                                   | Not given.                                                            | 42                                                                                      | 63.3                                                                                                                                     |

|                               |                                                                                                                                                                                               |                                                                                                                                                                                                                                                                                                              |                                                                                                                                                                                                                                                                                                                                                                                                                                                                                          |                                                                                                                                                                                                                                              |
|-------------------------------|-----------------------------------------------------------------------------------------------------------------------------------------------------------------------------------------------|--------------------------------------------------------------------------------------------------------------------------------------------------------------------------------------------------------------------------------------------------------------------------------------------------------------|------------------------------------------------------------------------------------------------------------------------------------------------------------------------------------------------------------------------------------------------------------------------------------------------------------------------------------------------------------------------------------------------------------------------------------------------------------------------------------------|----------------------------------------------------------------------------------------------------------------------------------------------------------------------------------------------------------------------------------------------|
| <b>Significance (P Value)</b> | <b>Reiki sig&gt;placebo (no p value)</b><br><b>P=0.0001 pre-post. d</b>                                                                                                                       | Post test p=0.029<br>One year follow up p =0.001                                                                                                                                                                                                                                                             | NS<br>Depression (p>0.05).                                                                                                                                                                                                                                                                                                                                                                                                                                                               | <b>Sig at all 4-time measurements.</b><br><b>1<sup>st</sup> p=0.001 4<sup>th</sup> p=0.000</b><br><b>8<sup>th</sup> p=0.000 12<sup>th</sup> p=0.000 (1 mth f.up)</b>                                                                         |
| <b>ROB 2</b>                  | Some Concerns                                                                                                                                                                                 | Some Concerns                                                                                                                                                                                                                                                                                                | <b>HIGH</b>                                                                                                                                                                                                                                                                                                                                                                                                                                                                              | Some Concerns                                                                                                                                                                                                                                |
| <b>Critique</b>               | -Unstated if assessors blind.<br>-Subjects self-selected in response to advertisement.<br>-No pre-specified analysis plan found.<br>-Follow up Reiki scores were not compared to other groups | High drop out from post treatment to f. up though analyzed on original numbers. (73 to 46)<br>-Placebo R led to believe Hands On was the placebo grp to reduce expectancy.<br>-SS self-selected in response to advertisement as being in need of treatment for self-perceived depression and stress/anxiety. | -double blinded i.e. PR thought they may be attuned in Reiki.<br>-20 historic controls used.<br>-16% missing data and cognitive FIM missing so data excluded from analysis. R often shown to influence cognition so > relevant to outcomes. ITT not done.<br>-Sig diff in age and severity of impairment at baseline – these made covariates but still may have affected results.<br>-No pre-specified analysis plan.<br>-Variation of 6-10 trts though not related to group assignment. | -One of only 2 studies blinding sham practitioners i.e. Reiki done by researcher but Placebo Reiki practitioners believed they were doing Reiki to control for practitioner expectancy effects.<br>-NI whether outcome assessors were blind. |

#### Depression: Outcomes Normal

**GRADE: MODERATE for NOT reducing normal depression.**

|                                     |                                                                                                                                                                                                                                               |                                                                                                                                                                                                                                         |
|-------------------------------------|-----------------------------------------------------------------------------------------------------------------------------------------------------------------------------------------------------------------------------------------------|-----------------------------------------------------------------------------------------------------------------------------------------------------------------------------------------------------------------------------------------|
|                                     | <b>Bowden, Goddard and Gruzelier (2010) Well-being.</b>                                                                                                                                                                                       | <b>Bowden et al. (2011) Mood and wellbeing in High vs Low Anxiety and Depression.</b>                                                                                                                                                   |
| <b>Population</b>                   | University students. London UK                                                                                                                                                                                                                | University students. London UK                                                                                                                                                                                                          |
| <b>N</b>                            | R18 PR17 (n=5 or 6 subgrp)                                                                                                                                                                                                                    | 40 R20 P20 (10 per high and Low)                                                                                                                                                                                                        |
| <b>Delivery</b>                     | Non-contact Reiki<br>No reiki (blind)<br>All self-hypnosis/ +ve imagery                                                                                                                                                                       | Non-contact Reiki<br>No Reiki                                                                                                                                                                                                           |
| <b>Time x Freq</b>                  | 10 x 20 mins varied weeks                                                                                                                                                                                                                     | 30mins x 6 varied weeks                                                                                                                                                                                                                 |
| <b>Measure</b>                      | DASS<br>HADS                                                                                                                                                                                                                                  | DASS<br>HADS                                                                                                                                                                                                                            |
| <b>Practitioner Level/Exp</b>       | Lvl 3 Master Usui, Seichim, Violet flame, Ascension R. No yrs exp given.<br>Not Researcher.                                                                                                                                                   | Lvl 3 Master Usui, Seichim, Violet flame, Ascension R. 4yrs exper.<br>Not Researcher.                                                                                                                                                   |
| <b>SS eyes/ touch</b>               | No touch 3-30 inches above head/back.<br>Blindfolded.                                                                                                                                                                                         | No touch 3-30 inches above head/back.<br>Blindfolded                                                                                                                                                                                    |
| <b>Baseline clinically relevant</b> | Healthy psych undergraduates.                                                                                                                                                                                                                 | No below cut-off for depression.                                                                                                                                                                                                        |
| <b>% Females</b>                    | 60%                                                                                                                                                                                                                                           | 82                                                                                                                                                                                                                                      |
| <b>Significance (P Value)</b>       | NS (p>0.05 no values given).                                                                                                                                                                                                                  | NS (p>0.05 no values given)                                                                                                                                                                                                             |
| <b>ROB 2</b>                        | Some Concerns                                                                                                                                                                                                                                 | Some Concerns                                                                                                                                                                                                                           |
| <b>Critique</b>                     | Author administered Reiki but unlikely to influence as sat behind a blindfolded SS no touch (blinding successful p<0.05)<br>-Very small sample size likely decreased power (5 or 6 in each group)<br>-No pre-specified plan.<br>-Dropouts 14% | Variation in the period of treatment: 2 to 8 weeks doesn't state how variation distributed bet groups.<br>-Very small sample decreased power.<br>-Experimenter administered Reiki.<br>-Participant blinding was assessed as successful. |

#### Burnout

**GRADE: MODERATE for reducing burnout.**

|                   |                                                             |                                                                 |                                                               |
|-------------------|-------------------------------------------------------------|-----------------------------------------------------------------|---------------------------------------------------------------|
|                   | Díaz-Rodríguez et al., (2011) Nurses with Burnout.          | Díaz-Rodríguez et al., (2011) Health Care Proff with Burnout. – | Rosada et.al. (2015) Burnout Mental health care professional. |
| <b>Population</b> | University hospital diagnosed with burnout. Granada, Spain. | University hospital diagnosed with burnout. Granada, Spain.     | Community mental health agencies New England, US              |
| <b>N</b>          | 18                                                          | 21                                                              | 45                                                            |

|                                     |                                                                                                                                    |                                                                                                                                                                                                                                                                                                   |                                                                                                                                                                                                                                                                                             |
|-------------------------------------|------------------------------------------------------------------------------------------------------------------------------------|---------------------------------------------------------------------------------------------------------------------------------------------------------------------------------------------------------------------------------------------------------------------------------------------------|---------------------------------------------------------------------------------------------------------------------------------------------------------------------------------------------------------------------------------------------------------------------------------------------|
|                                     |                                                                                                                                    |                                                                                                                                                                                                                                                                                                   |                                                                                                                                                                                                                                                                                             |
| <b>Delivery</b>                     | Hands not touching over body                                                                                                       | Hands not touching over body                                                                                                                                                                                                                                                                      | Hands on Reiki<br>Sham R                                                                                                                                                                                                                                                                    |
| <b>Time x Freq</b>                  | 30min x 1                                                                                                                          | 30min x 1                                                                                                                                                                                                                                                                                         | 30mins/week for 6 weeks then swap to 30 mins sham/wk for 6 weeks.                                                                                                                                                                                                                           |
| <b>Measure</b>                      | Omron HEM-737 validated. Average of Triplicate Measurements used.                                                                  | OMRON 510 for body temp. Saliva- lumin immune assay. Malach to diagnose burnout. Standardized software HRV and ECG.                                                                                                                                                                               | Maslach Burnout Inventory<br>Measure your medical outcome profile                                                                                                                                                                                                                           |
| <b>Practitioner Level/Exp</b>       | Lvl 3<br>Master<br>>15 yrs experience.<br>Usui                                                                                     | 3 master<br>15 yrs experience                                                                                                                                                                                                                                                                     | Lvl 2 & 3<br>6 mast 10 lvl 2.<br>5-21 yrs exp.<br>Not Researchers.                                                                                                                                                                                                                          |
| <b>SS eyes/ touch</b>               | No touch "over various parts body"<br>NI eyes.                                                                                     | No touch "over various parts body"<br>NI eyes.                                                                                                                                                                                                                                                    | Yes touch.<br>NI re eyes.                                                                                                                                                                                                                                                                   |
| <b>Baseline clinically relevant</b> | Yes<br>Diagnosed Burnout Syndrome.                                                                                                 | Yes<br>Diagnosed Burnout Syndrome.                                                                                                                                                                                                                                                                | NI if Burnout met cut-off on MBI means not given.                                                                                                                                                                                                                                           |
| <b>% Females</b>                    | 100                                                                                                                                | 100                                                                                                                                                                                                                                                                                               | 73                                                                                                                                                                                                                                                                                          |
| <b>Significance (P Value)</b>       | <b>Reiki reduced diastolic BP p=0.04</b><br><b>Increased SIgA p= 0.04</b><br>NS<br>Systolic BP p=0.24<br>a-amylase activity p=0.71 | <b>ECG recordings for SDNN sig higher then PR (p&lt;0.04).</b><br><b>Sig higher body temp then PR (p=0.02).</b><br><b>Higher body temp sig corr with LF domain after Reiki (p=0.02) suggesting effect on parasympatheticNS</b><br>NS over PR<br>Salivary Cortisol (p=0.08)<br>ECG RMSSD (p=0.06). | <b>Sig p=0.011</b><br><b>Reiki reduced burnout over placebo. Also reduced emotional exhaustion, depersonal, increased pers accomp (p&lt;0.05 no values given).</b>                                                                                                                          |
| <b>ROB 2</b>                        | Some Concerns                                                                                                                      | Some Concerns                                                                                                                                                                                                                                                                                     | Some Concerns                                                                                                                                                                                                                                                                               |
| <b>Critique</b>                     | NI found on pre-register.                                                                                                          | - NI found on pre-register.<br>-blinding of participants tested and found to be successful.                                                                                                                                                                                                       | -It is not stated whether volunteer outcome assessors were blind.<br>-Published study excludes some non-significant results found in original thesis suggesting selective reporting.<br>-baseline numbers between groups for single people not given and this is important to some results. |

Bolded text indicates significant outcomes.
